# Supplementary material for: Facile synthesis of nanostructured BiOI microspheres with high visible light-induced photocatalytic activity
Source: Royal Society of Chemistry journal article supplement (doi:10.1039/c0jm00333f), 2010-01-01
Supplement: c0jm00333f.pdf [file c0jm00333f.pdf]

# **Supporting Information**

## **Facile synthesis of nanostructured BiOI microspheres with high visible light-induced photocatalytic activity**

Xin Xiao <sup>1,2</sup>, Wei-De Zhang <sup>1,\*</sup>

<sup>1</sup> Nano Science Research Center, School of Chemistry and Chemical Engineering, South China University of Technology, Guangzhou 510640, PR China

<sup>2</sup> School of Chemistry and Environment, South China Normal University, Guangzhou 510006, PR China

---

\* To whom correspondence should be addressed. Tel.: +86 20 87114099; Fax: +86 20 87112053. E-mail: zhangwd@scut.edu.cn (W. D. Zhang).

Table S1. The serial numbers of the additional samples and their synthesis conditions

| samples | absolute ethanol <sup>a</sup> | distill water <sup>a</sup> | KI solution <sup>b</sup> | NH <sub>3</sub> ·H <sub>2</sub> O (1.5M) | NaOH (1.5M) |
|---------|-------------------------------|----------------------------|--------------------------|------------------------------------------|-------------|
| T1      | 20ml                          |                            | 40ml                     |                                          |             |
| T2      |                               | 20ml                       | 40ml                     | pH=7                                     |             |
| T3      | 20ml                          |                            | 40ml                     |                                          | pH=7        |
| T4      | 20ml                          |                            | 40ml                     | pH=3                                     |             |
| T5      | 20ml                          |                            | 40ml                     | pH=5                                     |             |
| T6      | 20ml                          |                            | 40ml                     | pH=9                                     |             |

<sup>a</sup> solvent for Bi(NO<sub>3</sub>)<sub>3</sub>·5H<sub>2</sub>O, <sup>b</sup> KI dissolved in distill water.

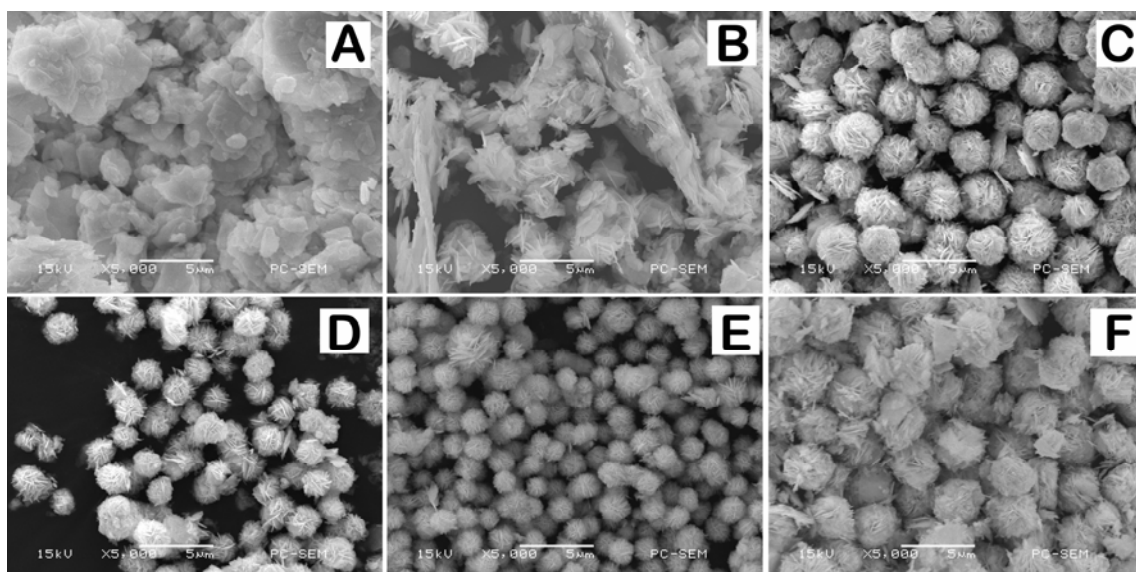

Figure S1. (A-F) SEM images of additional samples T1-T6, respectively.

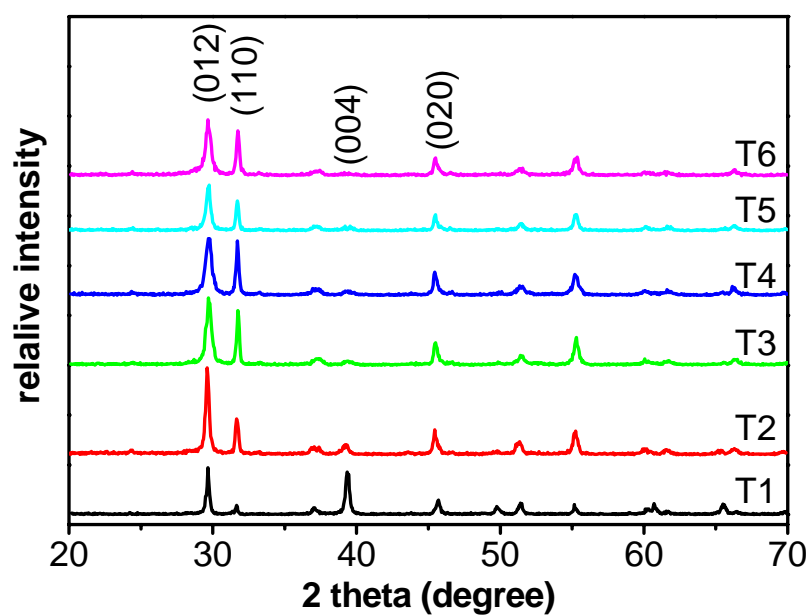

Figure S2. XRD patterns of additional samples.

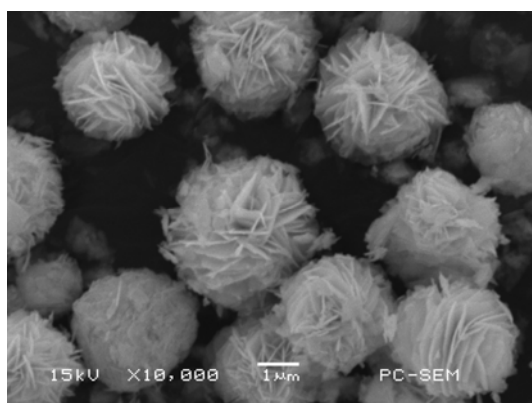

Figure S3. SEM image of 3D BiOI microspheres after the photocatalytic reaction.
